# Supplementary material for: Characterization of a dual-action adulticidal and larvicidal interfering RNA pesticide targeting the Shaker gene of multiple disease vector mosquitoes
Source: PubMed Central journal article supplement (PMC7392347; doi:10.1371/journal.pntd.0008479), 2020-07-20
Supplement: pntd.0008479.s002.pdf [file pntd.0008479.s002.pdf]

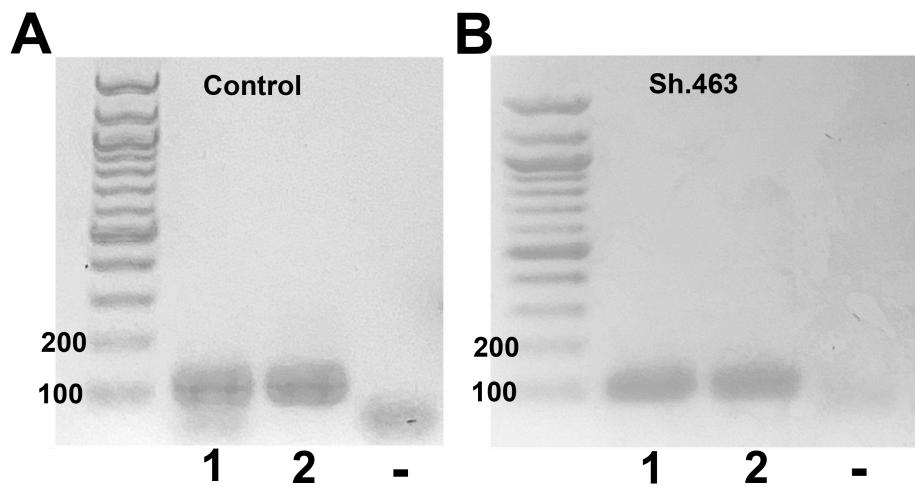

S2 Fig. Verification of shRNA expression in recombinant yeast strains.
