# Supplementary material for: Characterization of a dual-action adulticidal and larvicidal interfering RNA pesticide targeting the Shaker gene of multiple disease vector mosquitoes
Source: PubMed Central journal article supplement (PMC7392347; doi:10.1371/journal.pntd.0008479), 2020-07-20
Supplement: pntd.0008479.s003.pdf [file pntd.0008479.s003.pdf]

| <b>Mosquito Species or Taxonomic Group/Taxonomic ID</b> | <b>Identical Match?</b> | <b>Match Location</b>    |
|---------------------------------------------------------|-------------------------|--------------------------|
| <i>Aedes aegypti</i>                                    | Yes                     | AAEL000242               |
| <i>Aedes albopictus</i>                                 | Yes                     | AALF022329               |
| <i>Anopheles albimanus</i>                              | Yes                     | AALB006583               |
| <i>Anopheles arabiensis</i>                             | Yes                     | AARA012058               |
| <i>Anopheles christyi</i>                               | Yes                     | KB689759 (s)             |
| <i>Anopheles culicifacies</i>                           | Yes                     | ACUA008770               |
| <i>Anopheles darlingi</i>                               | Yes                     | scaffold_1546 (s)        |
| <i>Anopheles dirus</i>                                  | Yes                     | KB672491 (s)             |
| <i>Anopheles epiroticus</i>                             | Yes                     | AEPI010172               |
| <i>Anopheles farauti</i>                                | Yes                     | AFAF011906               |
| <i>Anopheles freeborni</i>                              | Yes                     | SRS008481_104582         |
| <i>Anopheles funestes</i>                               | Yes                     | AFUN000256               |
| <i>Anopheles gambiae</i>                                | Yes                     | AGAP000254               |
| <i>Anopheles maculatus</i>                              | Yes                     | AMAM001333               |
| <i>Anopheles melas</i>                                  | Yes                     | AMEC013303               |
| <i>Anopheles merus</i>                                  | Yes                     | AXCQ02011250 (s)         |
| <i>Anopheles minimus</i>                                | Yes                     | AMIN005805, AMIN009888   |
| <i>Anopheles punctulatus</i>                            | Yes                     | JXXA01008934.1 (s)       |
| <i>Anopheles quadrimaculatus</i>                        | Yes                     | GBTE01015309.1           |
| <i>Anopheles stephensi</i>                              | Yes                     | ASTE005450<br>ASTEI01122 |
| <i>Culex quinquefasciatus</i>                           | Yes                     | supercont3.226 (s)       |
| Amphibians/8292                                         | No                      | N/A                      |
| Arthropoda/6656 (other than mosquitoes)                 | No                      | N/A                      |
| Birds/8782                                              | No                      | N/A                      |
| Coleoptera/7041                                         | No                      | N/A                      |
| Crustacea/6657                                          | No                      |                          |
| Diptera/7147 (other than mosquitoes)                    | No                      | N/A                      |
| Fish/7898                                               | No                      | N/A                      |
| Fungi/4751                                              | No                      | N/A                      |
| Human/9606                                              | No                      | N/A                      |
| Mammals/40674                                           | No                      | N/A                      |
| Plants/3193                                             | No                      | N/A                      |
| Reptiles/8504                                           | No                      | N/A                      |

**S1 Table. Evaluation of Sh.463 Target Site Conservation.**
