# Supplementary material for: Characterization of a dual-action adulticidal and larvicidal interfering RNA pesticide targeting the Shaker gene of multiple disease vector mosquitoes
Source: PLOS journal article supplement (doi:10.1371/journal.pntd.0008479), 2020-07-20
Supplement: S1 (10.1371/journal.pntd.0008479.s001) [file journal.pntd.0008479.s001]

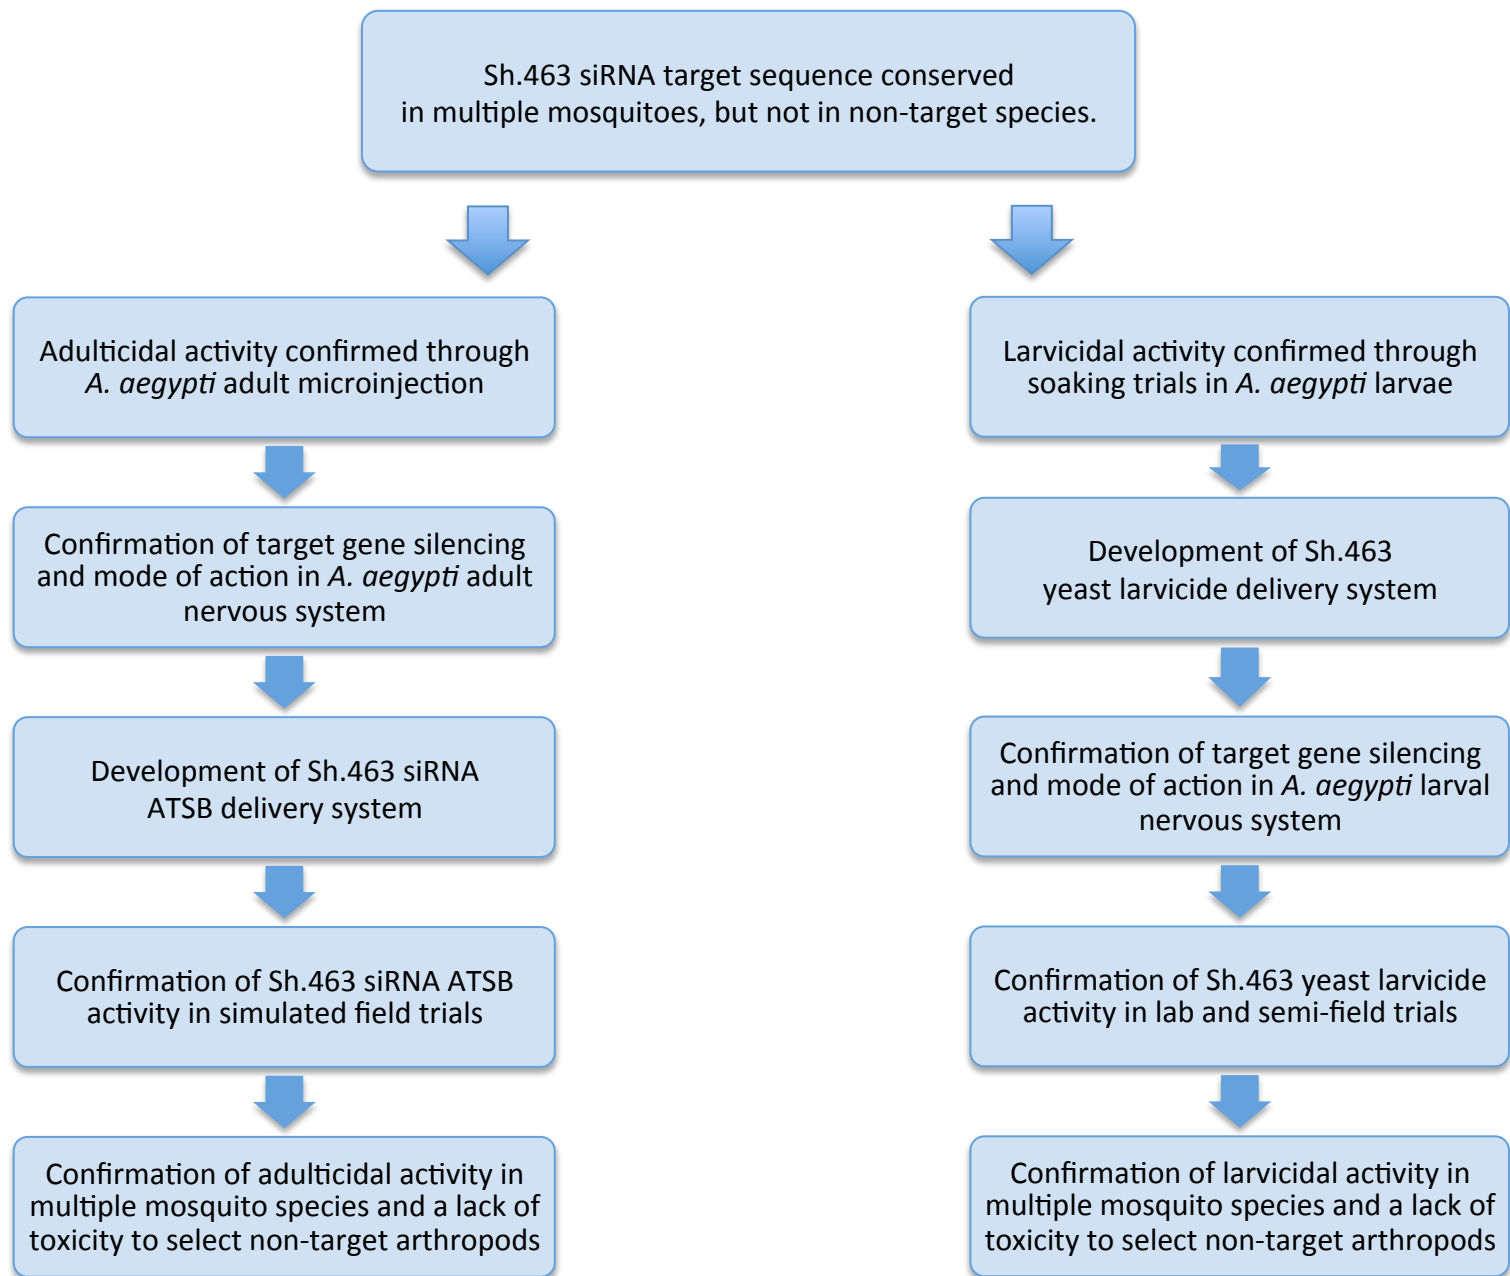

**S1 Fig. Summary of experimental research plan.**
